# Supplementary material for: Transcultural Adaption and Validation of Korean Version Freibrug Mindfulness Inventory (FMI): Assessing Mindfulness in Forest Therapy Sessions
Source: MDPI journal article supplement (doi:10.3390/f15030472), 2024-03-02

## Supplementary S5. Expected Score Curve

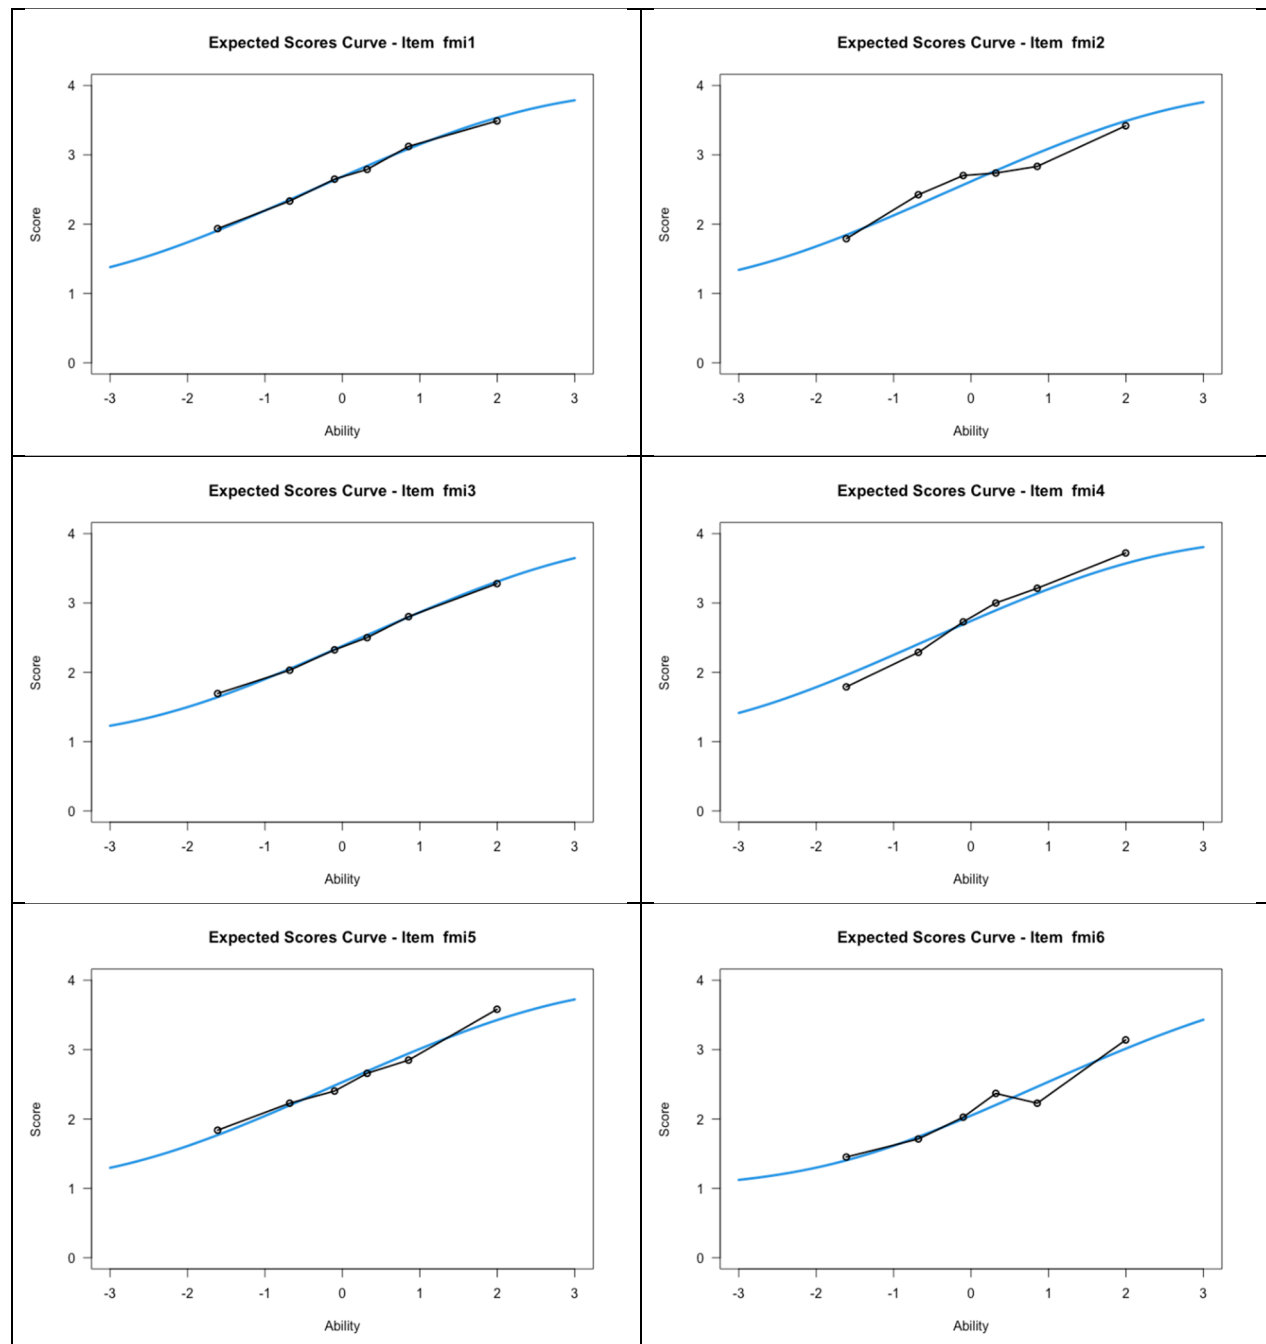

Expected Scores Curve - Item fmi7

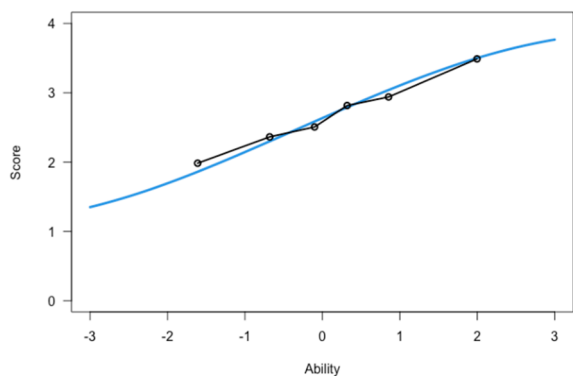

Expected Scores Curve - Item fmi8

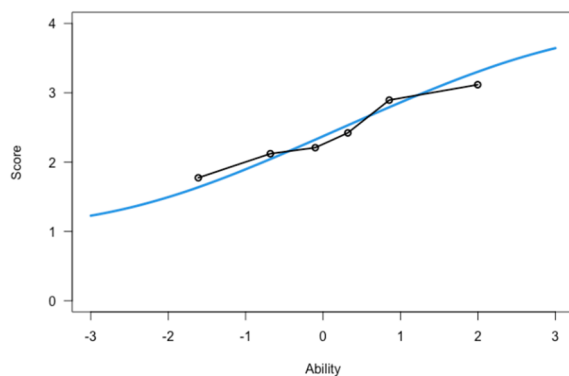

Expected Scores Curve - Item fmi9

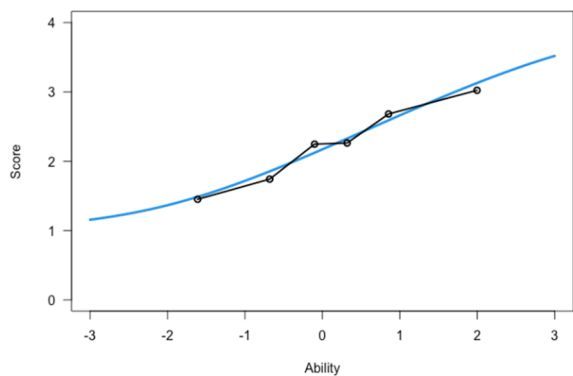

Expected Scores Curve - Item fmi10

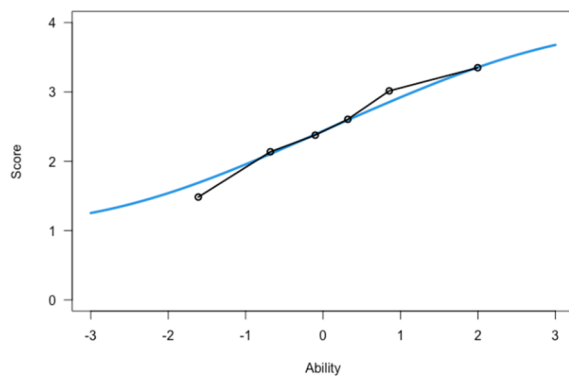

Expected Scores Curve - Item fmi11

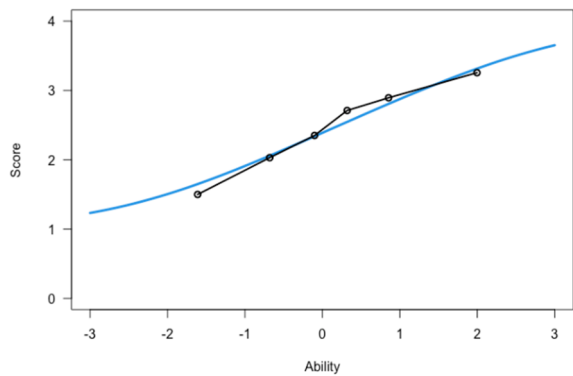

Expected Scores Curve - Item fmi12

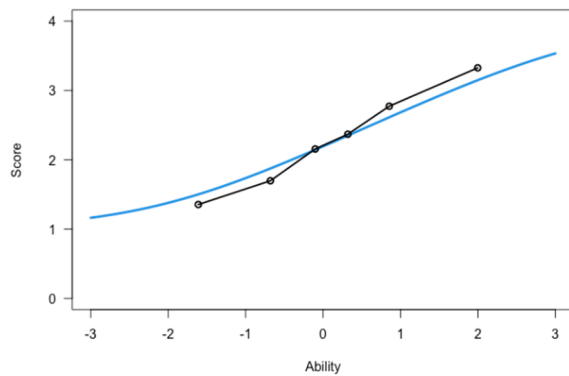

Expected Scores Curve - Item fmi13

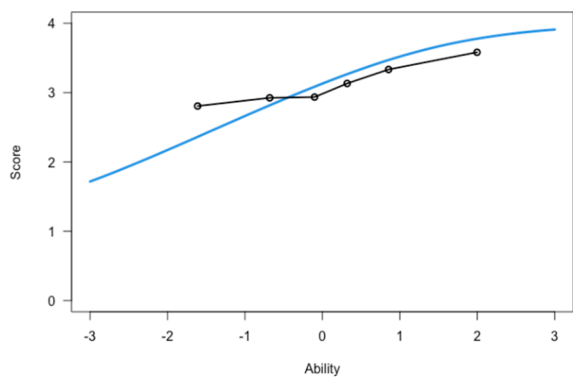

Expected Scores Curve - Item fmi14

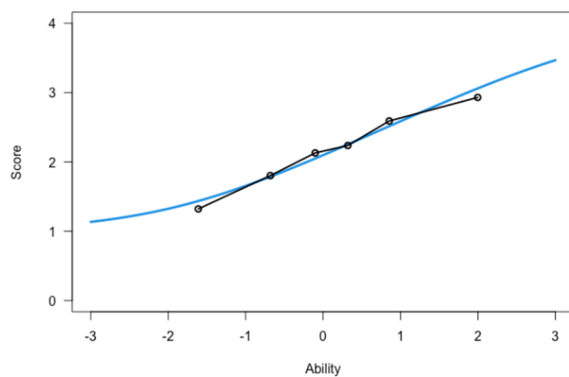

Supplement: s1 [file s1]
