# Supplementary material for: Transcultural Adaption and Validation of Korean Version Freibrug Mindfulness Inventory (FMI): Assessing Mindfulness in Forest Therapy Sessions
Source: MDPI journal article supplement (doi:10.3390/f15030472), 2024-03-02
Supplement: s1 [file s1]

Supplementary S1. Korean Version FMI

다음은 귀하의 마음챙김 경험에 대한 질문입니다. 평소(\_\_\_\_\_일) 일상을 기준으로 각 질문에 대해 주시면 됩니다. 각 문항에 솔직하게 답해주시되, 너무 깊게 생각하지 마시고 응답 부탁드립니다. 맞고 틀린 답이나, 좋고 나쁜 답은 없습니다. 귀하의 진실된 경험이 가장 중요합니다.

The purpose of this inventory is to characterize your experience of mindfulness. Please use the last \_\_\_\_ days as the time-frame to consider each item. Provide an answer for every statement as best you can. Please answer as honestly and spontaneously as possible. There are neither 'right' nor 'wrong' answers, nor 'good' or 'bad' responses. What is important to us is your own personal experience.

|   |                                                                                                                                                        | 드물게<br>Rarely | 가끔<br>Occasionally | 자주<br>Fairly often | 거의<br>항상<br>Almost always |
|---|--------------------------------------------------------------------------------------------------------------------------------------------------------|---------------|--------------------|--------------------|---------------------------|
|   |                                                                                                                                                        | 1             | 2                  | 3                  | 4                         |
| 1 | 나는 지금 순간의 경험에 마음이 열려 있다.<br>I am open to the experience of the present moment.                                                                         |               |                    |                    |                           |
| 2 | 나는 먹을 때나, 요리할 때나, 청소할 때나, 말할 때나, 나의 몸을 느낀다.<br>I sense my body, whether eating, cooking, cleaning or talking.                                          |               |                    |                    |                           |
| 3 | 나는 마음이 다른 곳에 가 있다는 것을 알아차릴 때, 부드럽게 지금 여기에서 일어나는 경험으로 돌아온다.<br>When I notice an absence of mind, I gently return to the experience of the here and now. |               |                    |                    |                           |
| 4 | 나는 나 스스로에게 감사할 수 있다.<br>I am able to appreciate myself.                                                                                                |               |                    |                    |                           |
| 5 | 나는 내 행동의 이면에 무엇이 있는지 주의를 기울인다.<br>I pay attention to what's behind my actions.                                                                         |               |                    |                    |                           |
| 6 | 나는 내 실수나 곤경을 판단하지 않고 바라본다.<br>I see my mistakes and difficulties without judging them.                                                                 |               |                    |                    |                           |
| 7 | 나는 지금 여기에서 일어나는 경험과 연결되어 있다고 느낀다.<br>I feel connected to my experience in the here-and-now.                                                            |               |                    |                    |                           |
| 8 | 나는 불쾌한 경험들도 받아들인다.<br>I accept unpleasant experiences.                                                                                                 |               |                    |                    |                           |
| 9 | 나는 무언가 잘못되어도 나 스스로에게 친절하다.<br>I am friendly to myself when things go wrong.                                                                            |               |                    |                    |                           |

|    |                                                                                                                                           | 드물게<br>Rarely | 가끔<br>Occasionally | 자주<br>Fairly often | 거의<br>항상<br>Almost always |
|----|-------------------------------------------------------------------------------------------------------------------------------------------|---------------|--------------------|--------------------|---------------------------|
|    |                                                                                                                                           | 1             | 2                  | 3                  | 4                         |
| 10 | 나는 휩쓸리지 않고 내 감정을 바라본다.<br>I watch my feelings without getting lost in them.                                                               |               |                    |                    |                           |
| 11 | 나는 힘든 상황에서 즉각적으로 반응하지 않고 잠시 멈출 수 있다.<br>In difficult situations, I can pause without immediately reacting.                                |               |                    |                    |                           |
| 12 | 나는 정신없고 스트레스 받는 상황 일지라도, 내면의 평화와 편안을 찾을 수 있다.<br>I experience moments of inner peace and ease, even when things get hectic and stressful. |               |                    |                    |                           |
| 13 | 나는 나 스스로와 남들에 대해 참을성이 없다.<br>I am impatient with myself and with others.                                                                  |               |                    |                    |                           |
| 14 | 나는 내가 가끔 삶을 얼마나 힘들게 하는지 알아차릴 때도 웃을 수 있다.<br>I am able to smile when I notice how I sometimes make life difficult.                         |               |                    |                    |                           |
