# Supplementary material for: Transcultural Adaption and Validation of Korean Version Freibrug Mindfulness Inventory (FMI): Assessing Mindfulness in Forest Therapy Sessions
Source: MDPI journal article supplement (doi:10.3390/f15030472), 2024-03-02
Supplement: s1 [file s1]

Supplementary S6. Descriptive statistics continued from Table 2

|    | Item                                                                                     | Skewness | Kurtosis | $\alpha$ If Deleted | Min-Max |     |
|----|------------------------------------------------------------------------------------------|----------|----------|---------------------|---------|-----|
|    |                                                                                          |          |          |                     | Min     | Max |
| 1  | I am open to the experience of the present moment.                                       | -0.07    | -0.49    | 0.87                | 1       | 4   |
| 2  | I sense my body, whether eating, cooking, cleaning or talking.                           | -0.17    | -0.5     | 0.87                | 1       | 4   |
| 3  | When I notice an absence of mind, I gently return to the experience of the here and now. | 0.21     | -0.51    | 0.87                | 1       | 4   |
| 4  | I am able to appreciate myself.                                                          | -0.11    | -0.75    | 0.86                | 1       | 4   |
| 5  | I pay attention to what's behind my actions.                                             | -0.07    | -0.64    | 0.87                | 1       | 4   |
| 6  | I see my mistakes and difficulties without judging them.                                 | 0.38     | -0.52    | 0.87                | 1       | 4   |
| 7  | I feel connected to my experience in the here-and-now.                                   | -0.02    | -0.48    | 0.87                | 1       | 4   |
| 8  | I accept unpleasant experiences.                                                         | 0.38     | -0.13    | 0.87                | 1       | 4   |
| 9  | I am friendly to myself when things go wrong.                                            | 0.25     | -0.68    | 0.87                | 1       | 4   |
| 10 | I watch my feelings without getting lost in them.                                        | -0.1     | -0.75    | 0.86                | 1       | 4   |
| 11 | In difficult situations, I can pause without immediately reacting.                       | -0.04    | -0.55    | 0.86                | 1       | 4   |
| 12 | I experience moments of inner peace and ease, even when things get hectic and stressful. | 0.16     | -0.73    | 0.86                | 1       | 4   |
| 13 | I am impatient with myself and with others.                                              | -0.37    | -0.64    | 0.88                | 1       | 4   |
| 14 | I am able to smile when I notice how I sometimes make life difficult.                    | 0.25     | -0.57    | 0.87                | 1       | 4   |
