# Supplementary material for: Transcultural Adaption and Validation of Korean Version Freibrug Mindfulness Inventory (FMI): Assessing Mindfulness in Forest Therapy Sessions
Source: MDPI journal article supplement (doi:10.3390/f15030472), 2024-03-02
Supplement: s1 [file s1]

Archive with 6 entries (6 files):
- Supp1.pdf
- Supp2.pdf
- Supp3.pdf
- Supp4.pdf
- Supp5.pdf
- Supp6.pdf
