# Supplementary figures and images for: Transcultural Adaption and Validation of Korean Version Freibrug Mindfulness Inventory (FMI): Assessing Mindfulness in Forest Therapy Sessions
Source: MDPI journal article supplement (doi:10.3390/f15030472), 2024-03-02

Supplementary S4. Information Curve

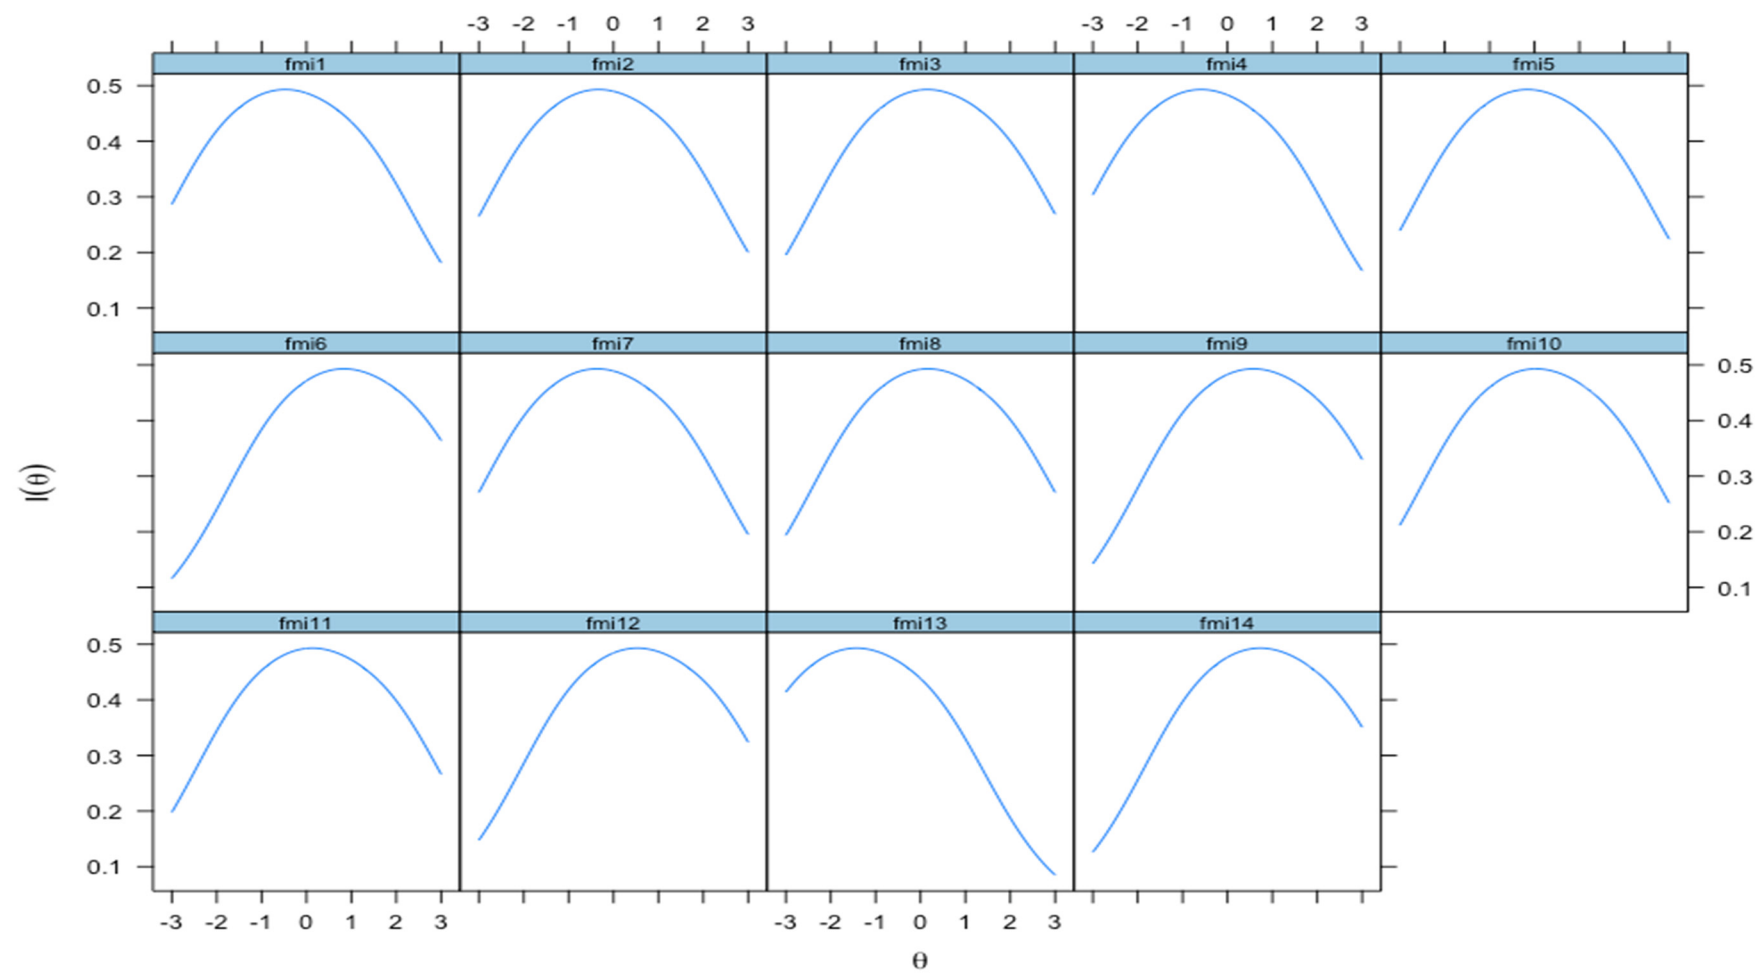

Supplement: s1 [file s1]

Supplementary S3. Item Characteristic Curve

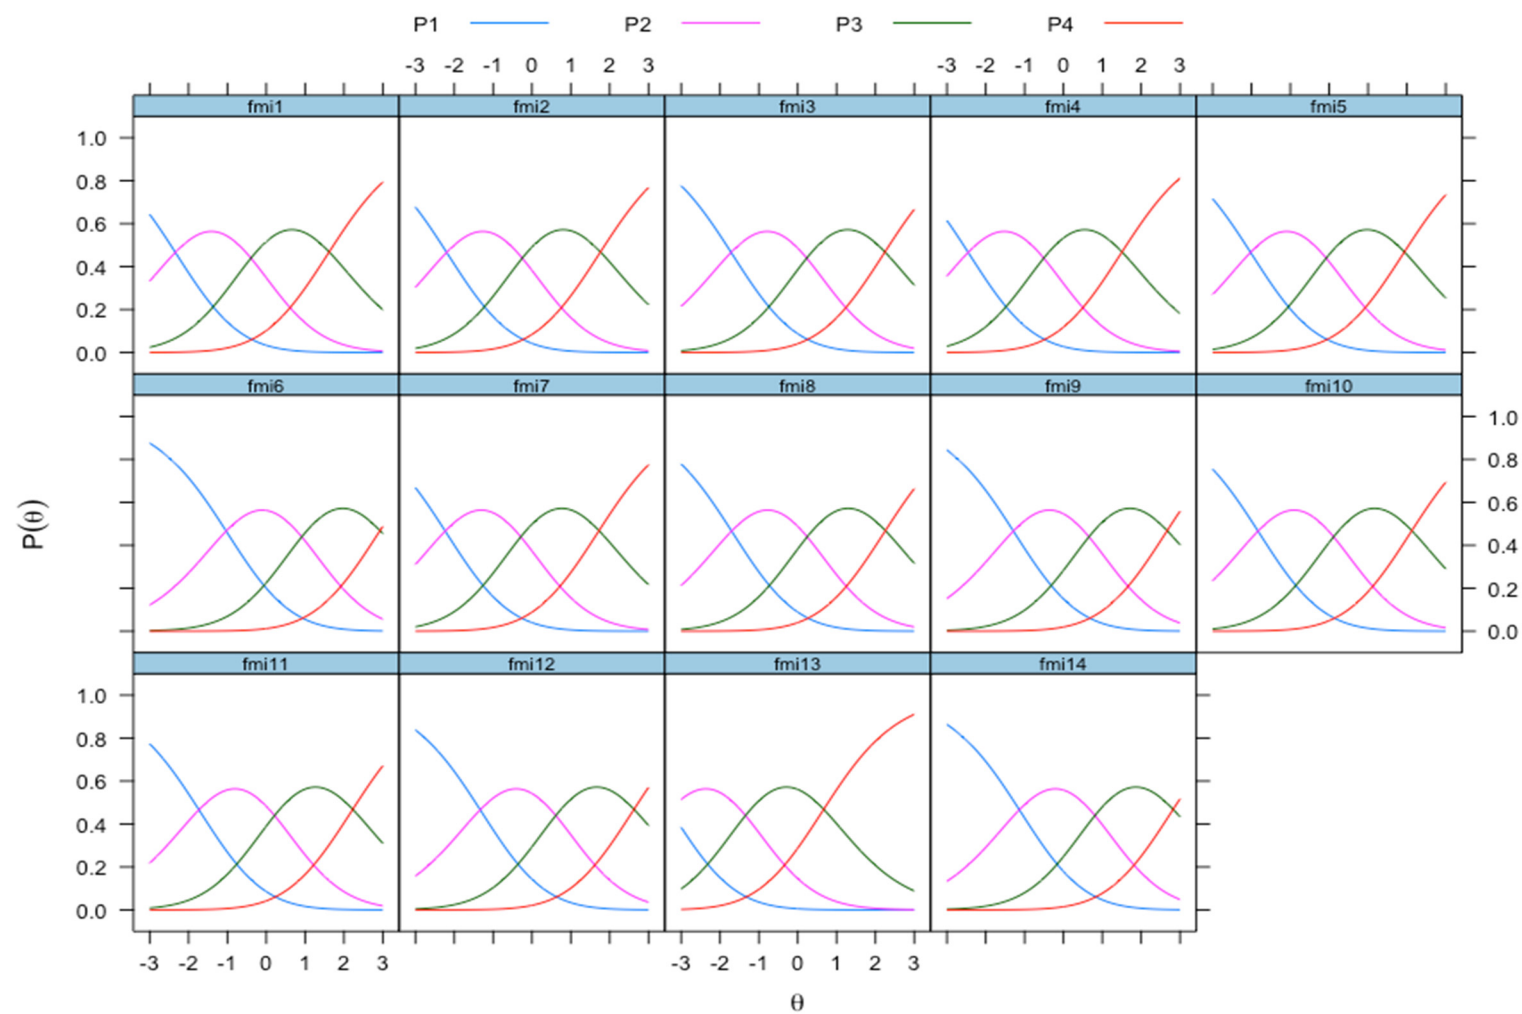

Supplement: s1 [file s1]

Supplementary S2. Scree plot

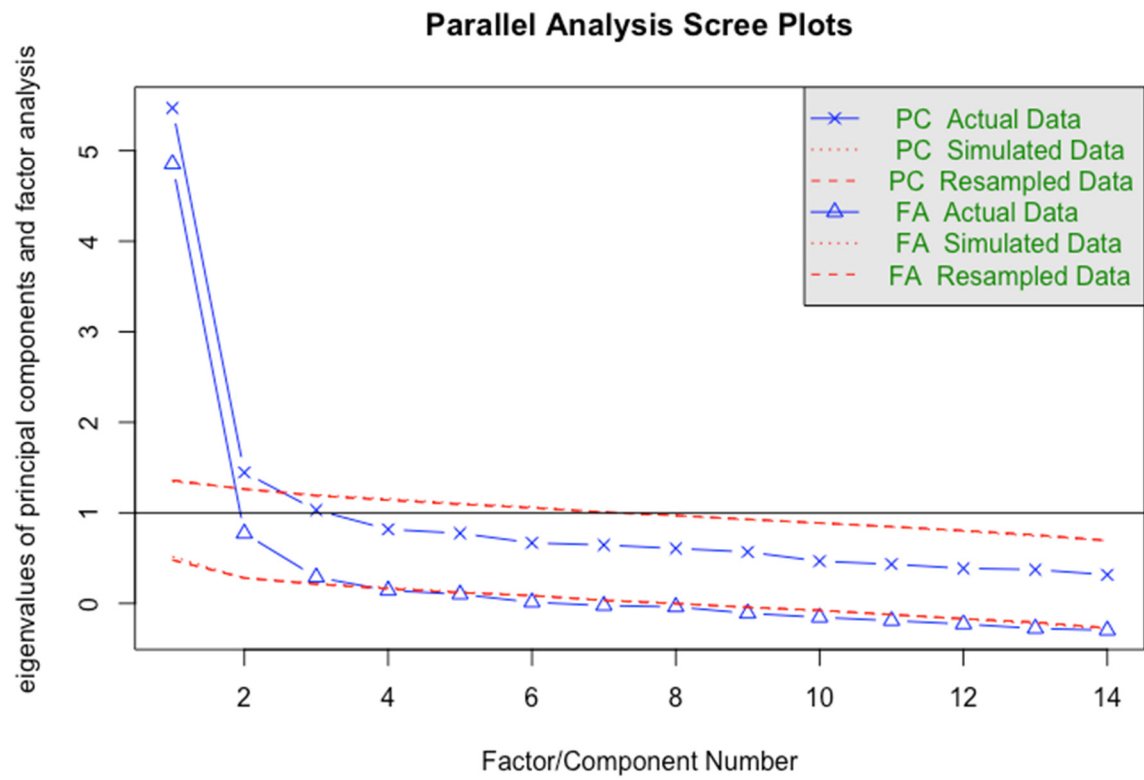

Supplement: s1 [file s1]
